# Supplementary material for: Deacetylase activity-independent transcriptional activation by HDAC2 during TPA-induced HL-60 cell differentiation
Source: PLoS One. 2018 Aug 24;13(8):e0202935. doi: 10.1371/journal.pone.0202935 (PMC6108480; doi:10.1371/journal.pone.0202935)
Supplement: S1 Table — (XLSX) [file pone.0202935.s004.xlsx]

## Sheet: Sheet2
	Name	Sequence (5'- to -3')	Purpose
	pIL10RA (-998 to -1) F	CGACGCGTGTTAGGAGGTACCAGGTGGTG	Promoter-luc
	pIL10RA (-998 to -1) R	CCGCTCGAGCCTGGGCGCGCCGCATCG
	pRGCC (-1334 to +13) F	CGACGCGTCTCACCCAGGGAAATCAA	Promoter-luc
	pRGCC (-1334 to +13) R	CCGCTCGAGCTTCATGAGGCGGCTCAG
	CAMK1 F	GACTCTCCTTACTGGGACGA	ChIP
	CAMK1 R	GATCTGCTCACTCACCGACT
	CCL5 F	TTTCTGCTTGCTCTTGTCCT	ChIP
	CCL5 R	GGGAAGGTTTTTGTAACTGCT
	HPGD F	GAGTAAGCAAAATGGAGGTGA	ChIP
	HPGD R	TGAGCGTGTGAATCCAACTA
	HVCN1 F	CTCCCACAGGTTTCAGGTC	ChIP
	HVCN1 R	TGGTGATGCTCATGTAGTGG
	IL10RA F	CAACTGTAGCCAGACCCTGT	ChIP
	IL10RA R	TGAAGCCATTGTGGATCTCT
	INHBA F	GGCCCTGCTACTGTACCTTG	ChIP
	INHBA R	GCTGGTGCTCAGGGTAAAAA
	LAPTM5 F	GATGCGGACATTGAAGCAG	ChIP
	LAPTM5 R	GTCTAAGGGGCAGGAAGGAA
	PPAP2A F	CCGCGAACACTCGGTTAG	ChIP
	PPAP2A R	CCGGTCCCCATCCTTAAA
	RAMP1 F	AAGTGAAATCCAGCCACCAG	ChIP
	RAMP1 R	ATGGGGGATCTTGGGTACAT
	RGCC F	CTTCACAGCCGAGGAAGC	ChIP
	RGCC R	CCGGTTACAGCCCCAAATA
	SLC2A3 F	TGTCCCCATCGCTGTAATCT	ChIP
	SLC2A3 R	TGGAGAAAACTTGCTGCTGA
	SGK1 F	GTTCAAGCCAAATCAGCAAA	ChIP
	SGK1 R	GCCAGCGGTAAACATTCTC
	AHNAK F	CCAGTAAACATGGGATACGAA	ChIP
	AHNAK R	GAAGTGCTTTGCTCCACTCT
	MGST3 F	ACCGCTGACTTAGAGCAAGA	ChIP
	MGST3 R	CACAACTTCGGGGAATGAC
	USP13 F	GTGCTGGTGGTTTTGCTC	ChIP
	USP13 R	TCGGAACAGGGAACTCTTG
	shHDAC2 3' UTR sense	CCGGCAGTCTCACCAATTTCAGAAACTCGAGTTTCTGAAATTGGTGAGACTGTTTTTG	shRNA
	shHDAC2 3' UTR antisense	AATTCAAAAACAGTCTCACCAATTTCAGAAACTCGAGTTTCTGAAATTGGTGAGACTG
	shHDAC2 CDS sense	CCGGCAGACTGATATGGCTGTTAATCTCGAGATTAACAGCCATATCAGTCTGTTTTTG	shRNA
	shHDAC2 CDS antisense	AATTCAAAAACAGACTGATATGGCTGTTAATCTCGAGATTAACAGCCATATCAGTCTG
	shPAX5 3' UTR sense	CCGGCTGACTATCCATCCATCATAACTCGAGTTATGATGGATGGATAGTCAGTTTTTG	shRNA
	shPAX5 3' UTR antisense	AATTCAAAAACTGACTATCCATCCATCATAACTCGAGTTATGATGGATGGATAGTCAG
	shPAX5 CDS sense	CCGGTCGCTGAATATAAACGCCAAACTCGAGTTTGGCGTTTATATTCAGCGATTTTTG	shRNA
	shPAX5 CDS antisense	AATTCAAAAATCGCTGAATATAAACGCCAAACTCGAGTTTGGCGTTTATATTCAGCGA
	HDAC2 F	TTGCCCTTGATTGTGAGATT	qPCR
	HDAC2 R	TTCTGGAGTGTTCTGGTTTG
	PAX5 F	CACCCAACCAACCAGTCC	qPCR
	PAX5 R	TCCTGAATACCTTCGTCTCTC
	GAPDH F	TGCACCACCAACTGCTTAGC	qPCR
	GAPDH R	GGCATGGACTGTGGTCATGAG
	CD11b F	CGATTCCGTGTTCACCCTGC	qPCR
	CD11b R	TGCCGCTTGAAGAAGCCGAG
	CAMK1 F	GACTCTCCTTACTGGGACGA	qPCR
	CAMK1 R	GATCTGCTCACTCACCGACT
	CCL5 F	TTTCTGCTTGCTCTTGTCCT	qPCR
	CCL5 R	GGGAAGGTTTTTGTAACTGCT
	HPGD F	GAGTAAGCAAAATGGAGGTGA	qPCR
	HPGD R	TGAGCGTGTGAATCCAACTA
	HVCN1 F	CTCCCACAGGTTTCAGGTC	qPCR
	HVCN1 R	TGGTGATGCTCATGTAGTGG
	IL10RA F	GAAGCAGAATTTTTCCACCA	qPCR
	IL10RA R	CACTGCGGTAAGGTCATAGG
	INHBA F	AACTACTGCGAGGGTGAGTG	qPCR
	INHBA R	ACACAGCACGATTTGAGGTT
	LAPTM5 F	CCATGAACCACATGAATTACC	qPCR
	LAPTM5 R	CTCTTCTCCTCCACCGAGTT
	PPAP2A F	ATATGTCGAGGGAATGCAGA	qPCR
	PPAP2A R	AAATGGATACGGCAACAAGA
	RAMP1 F	CTAACTACGGTGCCCTCCTC	qPCR
	RAMP1 R	CCAGGAAGAACCTGTCCAC
	RGCC F	ACTTCCACTACGAGGAGCAC	qPCR
	RGCC R	GAGAGAAGAGCTGGGGTAGA
	SLC2A3 F	GGGGCTATCTTGGTCTTTGT	qPCR
	SLC2A3 R	CCGACTAGGAAGTTGGAGGT
	SGK1 F	AGGATGGGTCTGAACGACTT	qPCR
	SGK1 R	GGTTTAGCATGAGGATTGGA
	AHNAK F	ACCGCTCAAATTCATTCAGT	qPCR
	AHNAK R	AACTTTCCCACCTTCCAGAG
	MGST3 F	GGCTATTACACGGGAGAACC	qPCR
	MGST3 R	AAGCCACTTTTAACCCAACC
	USP13 F	AATGTGGCCCCTAAAGAACT	qPCR
	USP13 R	TACGGATTTCACTGCCTACC
	PAX5 F	GGAATTCCGATGGATTTAGAGAAAAATTATCC	Cloning
	PAX5 R	GCTCTAGATCAGTGACGGTCATAGGC
